# Supplementary material for: Chemistry behind Quality—Emission of Volatile Enantiomers from Mentha spp. Plant Tissue in Relationship to Odor Sensory Quality
Source: Foods. 2023 May 19;12(10):2057. doi: 10.3390/foods12102057 (PMC10217043; doi:10.3390/foods12102057)
Supplement: Supplementary file 1 [file foods-12-02057-s001.zip › Supplementary materials File S2 Table S1 - Qualitative analysis of mint VOCs enantiomers.xlsx]

## Sheet: Arkusz1
Compound	RT1 [min]	MS match2 [%]	M1	M2	K1	K2	L1	L2
α-(-)-pinene	8.5	96	+	+	+	+	+	+
α-(+)-pinene	8.75	95	+	+	+	+	+	+
(+)-sabinene	9.66	91	+	+	+	+	+	+
(-)-sabinene	10	93	+	+	+	+	+	+
β-(+)-pinene	10.57	94	+	+	+	+	+	+
β-(-)-pinene	10.7	97	+	+	+	+	+	+
(-)-limonene	11.56	94	+	+	+	+	+	+
(+)-limonene	11.69	94	+	+	-	-	-	+
(-)-linalool	18.73	91	+	+	+	+	-	+
(+)-linalool	18.79	90	-	-	-	-	-	+
(-)-menthone	20	95	+	+	+	+	-	-
(+)-isomenthone	20.4	91	+	+	-	-	-	-
(+)-terpinen-4-ol	22.3	93	+	+	+	+	+	+
(-)-terpinen-4-ol	22.45	92	+	+	+	+	+	+
(+)-cis-dihydrocarvone	23.015	93	-	-	+	+	+	-
(-)-cis-dihydrocarvone	23.25	91	-	-	-	+	-	-
(-)-menthol	23.41	98	+	+	+	+	+	-
(-)-menthyl acetate	23.77	91	+	+	-	+	+	-
α-(+)-terpineol	24.03	92	+	-	-	-	-	-
α-(-)-terpineol	24.18	96	+	-	-	-	-	-
(+)-menthyl acetate	24.29	90	-	-	-	+	+	-
(+)-dihydrocarveol	24.9	91	-	-	+	+	+	-
(-)-borneol	24.95	90	-	-	-	-	-	-
(±)-carvone	25.1	96	-	+	+	+	+	-
(+)-piperitone	25.5	90	+	+	-	+	-	-
(-)-dihydrocarveol	25.9	90	-	-	+	+	-	-
(-)-trans-caryophyllene	28.31	93	+	+	+	+	+	-
1 Retention time; 2 Similarity of expermental and data base (FFNSC) mass spectra
